# Supplementary material for: Removal of Organics with Ion-Exchange Resins (IEX) from Reverse Osmosis Concentrate
Source: MDPI journal article supplement (doi:10.3390/membranes13020136), 2023-01-20
Supplement: s1 [file s1]

# Removal of organics by Ion-exchange resins (IEX) from Reverse Osmosis Concentrate

Sukanyah Devaisy<sup>1,2</sup>, Jaya Kandasamy<sup>1\*</sup>, Rupak Aryal<sup>1</sup>, Md Abu Hasan Johir<sup>1</sup>, Harsha Ratnaweera<sup>3</sup>, Saravanamuthu Vigneswaran<sup>1,3\*</sup>

<sup>1</sup> Faculty of Engineering, University of Technology Sydney (UTS), Broadway, NSW 2007, Australia

<sup>2</sup> Department of Bio-Science, Faculty of Applied Science, University of Vavuniya, Vavuniya 43000, Sri Lanka

<sup>3</sup> Faculty of Sciences and Technology (RealTek), Norwegian University of Life Sciences, NO-1432 Ås, Norway

\* Correspondence: jaya.kandasamy@uts.edu.au (J.K.); saravanamuth.vigneswaran@uts.edu.au (S.V.)

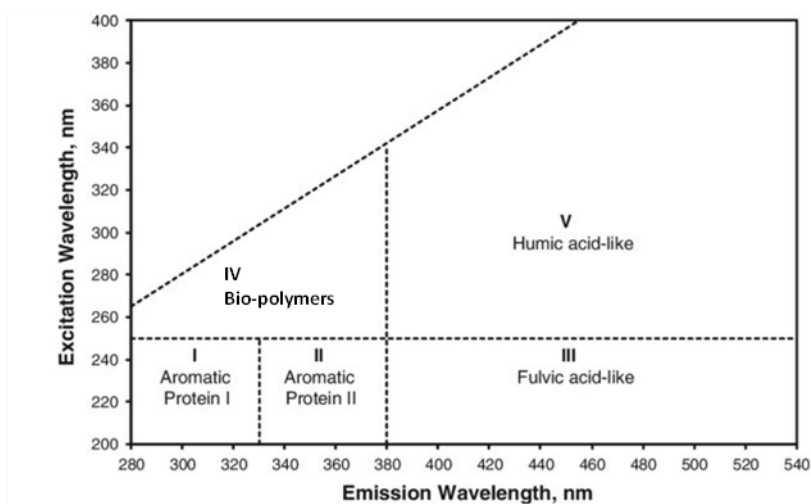

**Figure S1.** Five major EEM fluorescence regions (adapted from Chen et al. (28))

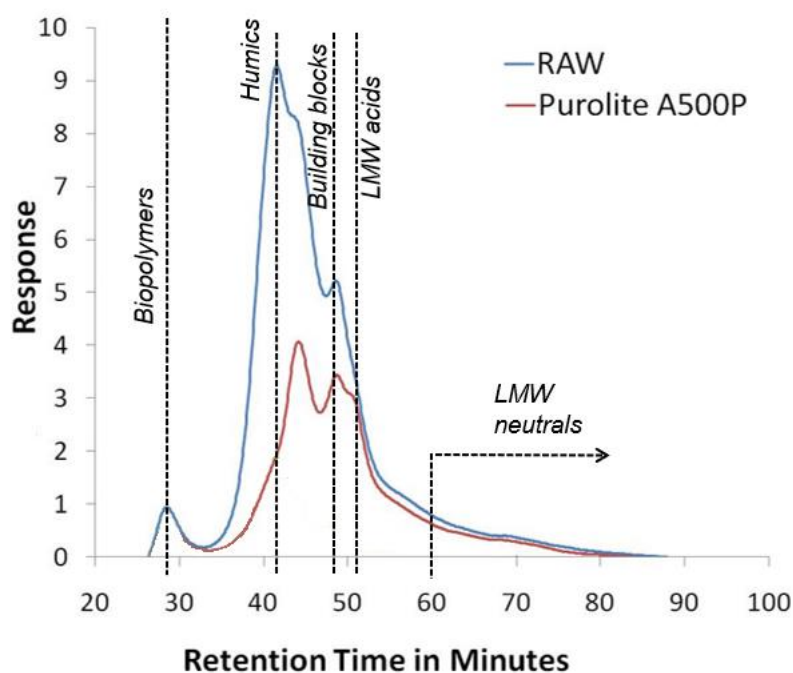

**Figure 2.** Sample LC OCD spectra showing different organic fractions

**Table S1.** Five major regions in EEM fluorescence spectra (28)

| Region                          | Chemical composition of organic matter                                          |
|---------------------------------|---------------------------------------------------------------------------------|
| I (P1): Ex:Em 200-250:280-330   | lower molecular weight tyrosine-like aromatic amino acids                       |
| II (P2): Ex:Em 200-250:330-380  | low molecular weight aromatic proteins and BOD-type substances                  |
| III (FA): Ex:Em 200-250:380-500 | fulvic acid type substances)                                                    |
| IV(SMP): Ex:Em 250-340:280-380  | large molecular weight peptides and proteins (microorganism related by-products |
| V(HA): Ex:Em 250-500:380-500    | humic acid type substances                                                      |
